# Supplementary material for: The contributions of deleterious rare alleles in NLRP12 and inflammasome-related genes to polymyalgia rheumatica
Source: PubMed Central journal article supplement (PMC10767114; doi:10.1038/s41598-024-51320-3), 2024-01-04
Supplement: 41598_2024_51320_MOESM1_ESM.pdf [file 41598_2024_51320_MOESM1_ESM.pdf]

Supplementary Table S1. Deleterious rare variants in the PMR patients.

| Gene          | Location       | Reference ID number | Nucleic acid change | Amino acid change | Number of deleterious alleles in the PMR patients | Frequencies in the Japanese populations |
|---------------|----------------|---------------------|---------------------|-------------------|---------------------------------------------------|-----------------------------------------|
| <i>NLRP12</i> | chr19:53794089 | rs146786265         | c.3149C>T           | p.Ala1050Val      | 2 alleles                                         | 0.008057                                |
|               | chr19:53804094 | rs1435753276        | c.2446G>T           | p.Ala816Ser       | 1 allele                                          | 0.000026                                |
|               | chr19:53811030 | rs377594629         | c.629C>T            | p.Pro210Leu       | 1 allele                                          | 0.001304                                |
|               | chr19:53824150 | rs762604819         | c.25G>A             | p.Gly9Ser         | 1 allele                                          | 0.001588                                |
| <i>PLCG2</i>  | chr16:81895901 |                     | c.1167C>G           | p.Ile389Met       | 1 allele                                          | 0.000013                                |
|               | chr16:81912602 | rs751244429         | c.1940A>C           | p.Tyr647Ser       | 1 allele                                          | 0.000956                                |
| <i>NLRP3</i>  | chr1:247434110 | rs772009059         | c.2335C>T           | p.Arg779Cys       | 1 allele                                          | 0.000310                                |
| <i>MEFV</i>   | chr16:3243343  | rs55901263          | c.2144C>G           | p.Pro715Arg       | 1 allele                                          | 0.000077                                |

PMR: polymyalgia rheumatica.
