# Supplementary material for: The contributions of deleterious rare alleles in NLRP12 and inflammasome-related genes to polymyalgia rheumatica
Source: PubMed Central journal article supplement (PMC10767114; doi:10.1038/s41598-024-51320-3), 2024-01-04
Supplement: 41598_2024_51320_MOESM2_ESM.pdf [file 41598_2024_51320_MOESM2_ESM.pdf]

Supplementary Table S2. Allele frequency of *MEFV* in the PMR patients and controls.

| <i>MEFV</i> allele | Case (2n=56) | Control (2n=77444) | <i>P</i> -value | OR   | 95%CI       |
|--------------------|--------------|--------------------|-----------------|------|-------------|
| S503C              | 0 (0.0)      | 1950 (2.5)         | 0.4067          | 0.34 | (0.02-5.55) |
| R408Q              | 2 (3.6)      | 3671 (4.7)         | 1.0000          | 0.74 | (0.18-3.05) |
| P369S              | 3 (5.4)      | 4239 (5.5)         | 1.0000          | 0.98 | (0.31-3.13) |
| G304R              | 1 (1.8)      | 2002 (2.6)         | 1.0000          | 0.69 | (0.09-4.95) |
| R202Q              | 2 (3.6)      | 2541 (3.3)         | 0.7067          | 1.09 | (0.27-4.48) |
| E148Q              | 10 (17.9)    | 17561 (22.7)       | 0.5224          | 0.74 | (0.37-1.47) |
| L110P              | 2 (3.6)      | 5354 (6.9)         | 0.4358          | 0.50 | (0.12-2.05) |
| E84K               | 0 (0.0)      | 1253 (1.6)         | 1.0000          | 0.54 | (0.03-8.71) |

PMR: polymyalgia rheumatica, OR: odds ratio, CI: confidence interval. Allele frequencies are shown in parenthesis (%). Allele frequencies of PMR patients were compared with those of Japanese population controls by Fisher's exact test using  $2 \times 2$  contingency tables under the allele model.
